# Supplementary material
Source: PubMed Central journal article supplement (PMC6854267)
Supplement: DS_10.1177_0022034518792567.pdf [file DS_10.1177_0022034518792567.pdf]

# Trends in Dental Implant Use in the U.S., 1999–2016, and Projections to 2026

H.W. Elani, J.R. Starr, J.D. Da Silva, and G.O. Gallucci

## Appendix

**Appendix Figure:** Implant prevalence by sociodemographic variable (age group, education level, race, and insurance type) among adults missing teeth in the National Health and Nutrition Examination Survey (NHANES) from 1999-2016.

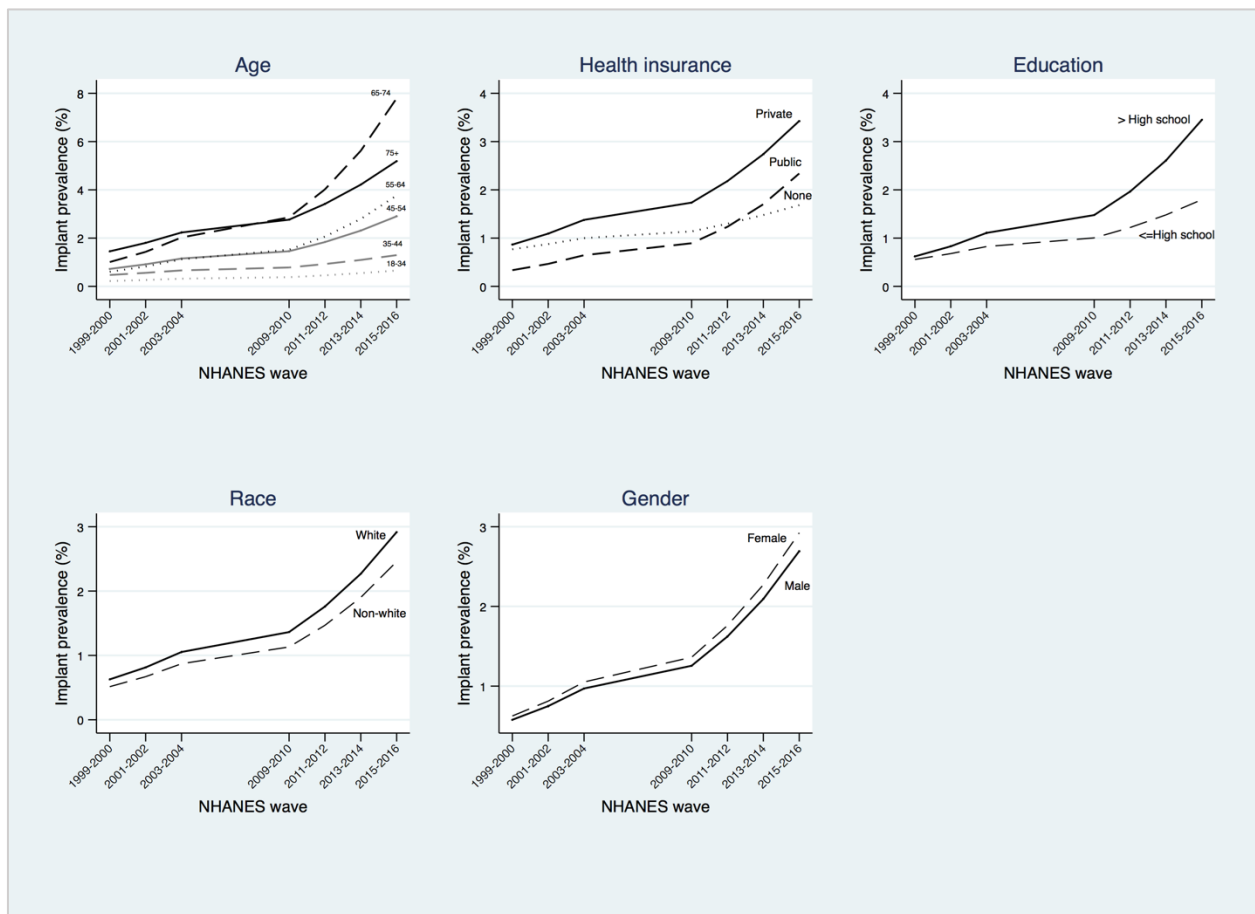

**Note:** Implant prevalence indicates the number of individuals who have at least one dental implant among all individuals with at least one missing tooth. NHANES waves included are: 1999-2000, 2001-2002, 2003-2004, 2009-2010, 2011-2012, 2013-2014, 2015-2016. Survey-weighted multivariable logistic regression models included NHANES year and participant's age, sex, education level, race, and insurance type.

**Appendix Table 1:** Implant distribution among adults with missing teeth receiving implants in the National Health and Nutrition Examination Survey (NHANES) from 1999-2016.

|             | %*<br>[95%CI]        |                      |                      |                      |                      |                      |                      |                      |
|-------------|----------------------|----------------------|----------------------|----------------------|----------------------|----------------------|----------------------|----------------------|
|             | Total sample         | 1999-2000            | 2001-2002            | 2003-2004            | 2009-2010            | 2011-2012            | 2013-2014            | 2015-2016            |
| <b>Arch</b> |                      |                      |                      |                      |                      |                      |                      |                      |
| Maxilla     | 48.8<br>[42.8, 54.9] | 28.4<br>[8.8, 61.8]  | 56.2<br>[36.1, 74.5] | 51.5<br>[24.3, 77.7] | 47.2<br>[35.5, 59.2] | 42.8<br>[25.3, 62.3] | 44.6<br>[32.3, 57.7] | 54.6<br>[44.6, 64.3] |
| Mandible    | 51.2<br>[45.1, 57.2] | 71.6<br>[38.2, 91.2] | 43.8<br>[25.5, 63.9] | 48.5<br>[22.3, 75.7] | 52.8<br>[40.8, 64.5] | 57.2<br>[37.7, 74.7] | 55.4<br>[42.3, 67.7] | 45.4<br>[35.7, 55.4] |
| <b>Site</b> |                      |                      |                      |                      |                      |                      |                      |                      |
| Anterior    | 29.7<br>[24.6, 35.4] | 53.9<br>[31.7, 74.6] | 38.5<br>[21.8, 58.5] | 30.2<br>[11.6, 58.8] | 17.9<br>[9.6, 31.0]  | 28.3<br>[14.3, 48.4] | 24.3<br>[13.7, 39.4] | 32.4<br>[24.5, 41.6] |
| Posterior   | 70.3<br>[64.6, 75.4] | 46.1<br>[25.4, 68.3] | 61.5<br>[41.5, 78.2] | 69.8<br>[41.2, 88.4] | 82.1<br>[69.0, 90.4] | 71.7<br>[51.6, 85.7] | 75.7<br>[60.6, 86.4] | 67.6<br>[58.4, 75.5] |

NB: All estimates are based on individuals aged 18 years and older

Implant prevalence indicates the number of individuals who have at least one dental implant among all individuals with at least one missing tooth.

\* Population-weighted proportions

**Appendix Table 2:** Implant prevalence according to tooth position among individuals receiving implants in the National Health and Nutrition Examination Survey (NHANES) from 1999-2016.

| Implant position | %* [95%CI]        |
|------------------|-------------------|
| #1i              | 0                 |
| #2i              | 2.9 [1.6, 5.1]    |
| #3i              | 10.2 [7.7, 13.4]  |
| #4i              | 9.2 [6.5, 13.0]   |
| #5i              | 7.6 [5.4, 10.6]   |
| #6i              | 4.0 [2.5, 6.4]    |
| #7i              | 9.5 [6.7, 13.3]   |
| #8i              | 8.6 [6.3, 11.6]   |
| #9i              | 9.2 [6.5, 12.9]   |
| #10i             | 9.5 [6.1, 14.4]   |
| #11i             | 5.9 [4.2, 8.3]    |
| #12i             | 8.0 [6.0, 10.5]   |
| #13i             | 7.4 [5.3, 10.3]   |
| #14i             | 9.8 [6.8, 13.9]   |
| #15i             | 2.2 [1.1, 4.3]    |
| #16i             | 0.4 [0.0, 1.5]    |
| #17i             | 0.2 [0.1, 1.0]    |
| #18i             | 6.0 [3.7, 9.8]    |
| #19i             | 17.6 [13.6, 22.4] |
| #20i             | 6.9 [4.7, 9.9]    |
| #21i             | 3.4 [2.0, 5.5]    |
| #22i             | 5.2 [3.5, 7.6]    |
| #23i             | 4.7 [2.9, 7.6]    |
| #24i             | 2.3 [1.1, 4.4]    |
| #25i             | 2.0 [1.0, 4.0]    |
| #26i             | 4.1 [2.4, 7.1]    |
| #27i             | 5.4 [4.0, 7.4]    |
| #28i             | 5.4 [3.6, 8.0]    |
| #29i             | 8.4 [6.0, 11.5]   |
| #30i             | 16.9 [12.8, 21.9] |
| #31i             | 8.5 [6.1, 11.8]   |
| #32i             | 0.5 [0.2, 1.5]    |

NB: All estimates are based on individuals aged 18 years and older

Implant prevalence indicates the number of individuals who have at least one dental implant among all individuals with at least one missing tooth.

\* Population-weighted proportions
